# Supplementary material
Source: publisher figshare collection journal article supplement (https://karger.figshare.com/ndownloader/files/25777451)
Supplement: Supplementary file 1 [file 25777451]

**Supplementary Table 1:** Results of log rank statistics according to location of metastases

|  | **Mean OS** | **95%-confidence interval** |
| --- | --- | --- |
| **Primary metastatic disease** | 41.1 | 30.7 – 51.4 |
| **Visceral metastases** | 55.1 | 40.5 – 69-8 |
| **Lymph node / soft tissue metastases** | 52.4 | 42.4 – 62.5 |
| **Bone metastases** | 73.9 | 57.4 – 90.4 |
| **overall** | 58.9 | 48.7 – 69.0 |
